# Supplementary material
Source: PubMed Central journal article supplement (PMC5644965)
Supplement: ofa-0010-0386-s01.pdf [file ofa-0010-0386-s01.pdf]

This article is licensed under the Creative Commons Attribution-NonCommercial 4.0 International License (CC BY-NC) (<http://www.karger.com/Services/OpenAccessLicense>). Usage and distribution for commercial purposes requires written permission.

**Original Article**

---

# **S100A8/A9 (Calprotectin), Interleukin-6, and C-Reactive Protein in Obesity and Diabetes before and after Roux-en-Y Gastric Bypass Surgery**

Louise Lylloff<sup>a</sup> Lise Bathum<sup>a</sup> Sten Madsbad<sup>b</sup>  
Josefine Liv Gilling Grundtvig<sup>c</sup> Inge Nordgaard-Lassen<sup>d</sup>  
Mogens Fenger<sup>a</sup>

<sup>a</sup>Department of Clinical Biochemistry, Copenhagen University Hospital Hvidovre, Hvidovre, Denmark; <sup>b</sup>Department of Endocrinology, Copenhagen University Hospital Hvidovre, Hvidovre, Denmark; <sup>c</sup>Gastrounit, Medical Division, Copenhagen University Hospital Hvidovre, Hvidovre, Denmark

## **Supplemental Material**

Lylloff et al.: S100A8/A9 (Calprotectin), Interleukin-6, and C-Reactive Protein in Obesity and Diabetes before and after Roux-en-Y Gastric Bypass Surgery

**Supplementary table 1.** Median levels and relative decreases of BMI, HOMA-IR and diabetes and inflammatory variables of all participants

|                                         | Pre |                  | Post |                  | Relative decrease |
|-----------------------------------------|-----|------------------|------|------------------|-------------------|
|                                         | N   | Median (95%CI)   | n    | Median (95%CI)   | Median (95%CI)    |
| BMI ( kg/m <sup>2</sup> )               | 48  | 42.3 (40.8;44.5) | 48   | 30.5 (29.4;31.7) | 0.26 (0.24;0.29)  |
| HbA1C (mmol/mol)                        | 47  | 42 (40;48)       | 48   | 36 (34;38)       | 0.18 (0.14;0.22)  |
| Glucose (mmol/L)                        | 45  | 5.9 (5.6;6.4)    | 47   | 5.2 (5.1;5.5)    | 0.12 (0.09;0.15)  |
| C-peptide (pmol/L)                      | 48  | 1031 (811;1278)  | 48   | 583 (523;715)    | 0.42 (0.36;0.48)  |
| Insulin (pmol/L)                        | 41  | 122 (110;163)    | 45   | 43.4 (34.3;53.0) | 0.65 (0.57;0.72)  |
| HOMA-IR                                 | 39  | 5.11 (3.76;6.46) | 44   | 1.63 (1.29;2.01) | 0.69 (0.59;0.76)  |
| S100A8/A9 (µg/L)                        | 47  | 960 (765;1137)   | 47   | 547 (424;623)    | 0.39 (0.25;0.50)  |
| IL-6 (ng/L)                             | 44  | 2.4 (2.1;2.9)    | 42   | 1.6 (1.3;2.3)    | 0.34 (0.19;0.43)  |
| CRP (mg/L)                              | 47  | 5.0 (3.0;7.0)    | 48   | 1.0 (1.0;1.0)    | 0.71 (0.70;0.83)  |
| Leukocyte count ( x 10 <sup>9</sup> /L) | 48  | 6.3 (5.8;7.0)    | 48   | 6.0 (5.5;6.3)    | 0.08 (0.04;0.15)  |

The relative decreases were calculated as ((Pre-surgical value-Post-surgical value)/Pre-surgical value)). As S100A8/A9- and CRP-values were truncated at values of 400 µg/L and 0.3 mg/L, respectively, the decreases of these variables are minimum decreases.

Lylloff et al.: S100A8/A9 (Calprotectin), Interleukin-6, and C-Reactive Protein in Obesity and Diabetes before and after Roux-en-Y Gastric Bypass Surgery

**Supplementary table 2.** Median relative decreases of BMI, HOMA-IR and diabetes and inflammatory variables within the single groups

| Median (95%CI) relative decreases, pre- to post-surgically |         |                    |         |                   |         |                   |
|------------------------------------------------------------|---------|--------------------|---------|-------------------|---------|-------------------|
| Group                                                      | T2DM+/+ |                    | T2DM+/- |                   | T2DM-/- |                   |
|                                                            | n       |                    | n       |                   | N       |                   |
| BMI ( kg/m <sup>2</sup> )                                  | 10      | 0.25(0.21;0.34)    | 19      | 0.27 (0.24;0.31)  | 19      | 0.28 (0.20;0.33)  |
| HbA1C (mmol/mol)                                           | 9       | 0.24 (0.06;0.42)   | 19      | 0.21 (0.17;0.36)  | 19      | 0.14(0.03;0.17)   |
| Glucose (mmol/L)                                           | 9       | 0.33 (-0.08;0.56)  | 16      | 0.13(-0.04;0.24)  | 19      | 0.10 (0;0.15)     |
| C-peptide (pmol/L)                                         | 10      | 0.37(-0.01;0.51)   | 19      | 0.45 (0.37;0.53)  | 19      | 0.41(0.24;0.57)   |
| Insulin (pmol/L)                                           | 4       | 0.62 (0.39;0.75)   | 18      | 0.64 (0.56;0.73)  | 17      | 0.64 (0.40;0.74)  |
| HOMA-IR                                                    | 4       | 0.73(0.46;0.89)    | 15      | 0.70 (0.57;0.80)  | 17      | 0.68 (0.46;0.78)  |
| S100A8/A9 (µg/L)                                           | 10      | 0.47 (0.00; 0.68)  | 19      | 0.38 (0.25; 0.53) | 18      | 0.37 (0.03;0.53)  |
| IL-6 (ng/L)                                                | 8       | 0.32 (-0.28; 0.74) | 16      | 0.28 (0.17;0.43)  | 17      | 0.40 (0.17;0.47)  |
| CRP (mg/L)                                                 | 9       | 0.70 (0.38; 0.97)  | 19      | 0.70 (0.78; 0.86) | 19      | 0.70 (0.40;0.83)  |
| Leukocyte count (x10 <sup>9</sup> /L)                      | 10      | 0.17 (-0.15;0.36)  | 19      | 0.09 (0.02; 0.18) | 19      | 0.06 (-0.02;0.22) |

The relative decreases were calculated as ((Pre-surgical value-Post-surgical value)/Pre-surgical value)).

As S100A8/A9- and CRP-values were truncated at values of 400 µg/L and 0.3 mg/L, respectively, the decreases of these variables are minimum decreases.

Significance levels of differences between the three groups are indicated by \*  $p \leq 0.05$ , \*\*  $p \leq 0.01$ , \*\*\* $p \leq 0.001$  and \*\*\*\* $p \leq 0.0001$  and ns = no significance

Lylloff et al.: S100A8/A9 (Calprotectin), Interleukin-6, and C-Reactive Protein in Obesity and Diabetes before and after Roux-en-Y Gastric Bypass Surgery

**Supplementary table 3.** Spearman Rank correlation coefficients of the relative decrease of IL-6 to those of BMI, HOMA-IR and diabetes and inflammatory variables

|                 | T2DM+/+ |                | T2DM+/- |                | T2DM-/- |                |
|-----------------|---------|----------------|---------|----------------|---------|----------------|
|                 | n       | r (p-value)    | n       | r (p-value)    | n       | r (p-value)    |
| BMI             | 8       | 0.072 (0.871)  | 16      | 0.437 (0.092)  | 17      | -0.003 (0.991) |
| HbA1C           | 8       | 0.643 (0.096)  | 16      | 0.039 (0.885)  | 17      | -0.232 (0.368) |
| Glucose         | 8       | 0.071 (0.882)  | 13      | -0.039 (0.902) | 17      | -0.313 (0.220) |
| C-peptide       | 8       | -0.240 (0.565) | 16      | -0.172 (0.521) | 17      | -0.130 (0.617) |
| Insulin         | 4       | nd             | 15      | -0.076 (0.788) | 15      | -0.159 (0.569) |
| HOMA-IR         | 4       | nd             | 12      | -0.168 (0.604) | 15      | -0.197 (0.477) |
| CRP             | 7       | 0.342(0.459)   | 16      | 0.207 (0.439)  | 17      | 0.224 (0.384)  |
| Leukocyte count | 8       | 0.571 (0.151)  | 16      | 0.353 (0.178)  | 17      | 0.319 (0.211)  |

Spearman rank correlations coefficients r (p-value) of the relative decreases of IL-6 to those of BMI, HOMA-IR and diabetes and inflammatory variables. Due to the sample sizes the correlations to insulin and HOMA-IR in T2DM+/+ were not done (nd).
